# Supplementary material
Source: PubMed Central journal article supplement (PMC6988395)
Supplement: baADV2019001021-suppl1.pdf [file baADV2019001021-suppl1.pdf]

## **Supplemental Tables and Figures**

**Supplemental Table 1.** Characteristics of patients who were excluded within 100 days after allogeneic HSCT.

**Supplemental Table 2.** Incidence of post-transplant events such as acute GVHD, CMV reactivation, and infection within 100 days after allogeneic HSCT.

**Supplemental Table 3.** Immune reconstitution after allogeneic HSCT represented as absolute cell numbers (cells / $\mu$ L) and IgG (mg/dL) levels measured at various time points and classified according to graft sources. Median values of temporal measurements are listed according to graft sources.

**Supplemental Table 4.** Comparison of median and cut-off values, using Kruskal–Wallis one-way analysis and ROC according to graft sources, respectively.

**Supplemental Figure 1.** Distinct differences in recovery of NK cell and B cell subsets as a function of conditioning intensity and graft source. Regarding NK cell recovery, a reduced conditioning intensity resulted in rapid IR in patients who received UCB. By contrast, there was a significant difference in stem cell source, rather than conditioning intensity, important for B cell recovery.

**Supplemental Figure 2.** Heat map of temporal reconstitution of lymphocytes for OS at different landmark time points. Univariate analysis showing HRs and *P*-values for each lymphocyte at different time points. Median cell counts were used for landmark analyses. \**P* < 0.05; \*\**P* < 0.01; \*\*\**P* < 0.001. CD4<sup>+</sup> T cell subsets demonstrated clinical significance during the early phase. The counts of almost every cell type showed clinical difference on day 100 after allogeneic HSCT. CD20<sup>+</sup> B cell and NK cell subsets continued to have a clinical impact on long-term outcomes.

**Supplemental Figure 3.** Graft-validated outcomes at 2 years after allogeneic HSCT based on key cell subsets, namely, CD20<sup>+</sup> B cells, CD8<sup>+</sup>CD11b<sup>-</sup> T cells, and CD16<sup>+</sup>CD57<sup>-</sup> NK cells. \*\**P* < 0.01; \*\*\**P* < 0.001. Higher counts of these key cells conferred a survival benefit to all recipients regardless of the graft source.

Supplemental Table 1.

Characteristics of patients who were excluded within 100 days after allogeneic HSCT.

|                               | excluded patients (N=48) | CB (N=17) | BM (N=18) | PBSC (N=13) | p value |
|-------------------------------|--------------------------|-----------|-----------|-------------|---------|
| Events, n (%)                 |                          |           |           |             |         |
| Early death                   | 23 (47.8)                | 3         | 12        | 8           | 0.0078  |
| Disease progression           | 4 (8.3)                  | 2         | 2         | 0           | NA      |
| Non-relapse mortality         | 19 (39.5)                | 1         | 10        | 8           | 0.002   |
| Primary graft failure         | 21 (44.8)                | 10        | 6         | 5           | 0.285   |
| Absent of IR data at 100 days | 4 (8.3)                  | 4         | 0         | 0           | NA      |

NA, no available *P* value by Fisher exact probability test.

CB, cord blood; BM, bone marrow; PBSC, peripheral blood stem cell IR; immune reconstitution.

Supplemental Table 2.

Incidence of posttransplant events such as acute GVHD, CMV reactivation, and infection within 100 days after allogeneic HSCT.

|                                |       | ALL (N=310) | CB (N=136) | BM (N=119) | PBSC (N=55) | p value |
|--------------------------------|-------|-------------|------------|------------|-------------|---------|
| <b>Events, n (%)</b>           |       |             |            |            |             |         |
| <b>Acute GVHD</b>              |       |             |            |            |             |         |
| Grade                          | 0     | 140 (45.2)  | 69 (50.7)  | 42 (35.2)  | 29 (52.7)   | <0.001  |
|                                | I     | 40 (12.9)   | 18 (13.2)  | 17 (14.3)  | 5 (9.1)     |         |
|                                | II    | 101(32.6)   | 42 (30.9)  | 46 (38.7)  | 13 (23.6)   |         |
|                                | III   | 16 (5.2)    | 5 (3.7)    | 8 (6.7)    | 3 (5.5)     |         |
|                                | IV    | 13 (4.2)    | 2 (1.5)    | 6 (5.1)    | 5 (9.1)     |         |
| Target organs                  |       |             |            |            |             |         |
| grade II toIV                  | Total | 130 (42.0)  | 49 (36.0)  | 60 (50.4)  | 21 (38.2)   | 0.08    |
|                                | Skin  | 81(26.1)    | 29 (21.3)  | 42 (35.3)  | 10 (18.2)   |         |
|                                | Liver | 4 (1.3)     | 1 (0.7)    | 2 (1.7)    | 1 (1.8)     |         |
|                                | Gut   | 35 (11.3)   | 19 (13.9)  | 16 (13.4)  | 10 (18.2)   |         |
| <b>CMV reactivation</b>        |       |             |            |            |             |         |
|                                | Yes   | 169 (54.5)  | 83 (61.0)  | 64 (53.8)  | 22 (40.0)   | 0.029   |
|                                | No    | 141 (45.5)  | 53 (39.0)  | 55 (46.2)  | 33 (60.0)   |         |
| <b>Pretransplant infection</b> |       |             |            |            |             |         |
|                                | Yes   | 28 (9.0)    | 10 (7.4)   | 11 (9.2)   | 7 (12.7)    | 0.499   |
|                                | No    | 282 (91)    | 126 (92.6) | 108 (90.8) | 48 (87.3)   |         |
| <b>Severe infection</b>        |       |             |            |            |             |         |
|                                | Yes   | 87 (28.1)   | 46 (33.8)  | 37 (31.1)  | 8 (14.5)    | 0.016   |
|                                | No    | 223 (71.9)  | 90 (66.2)  | 82 (68.9)  | 47 (85.5)   |         |

CB: cord blood, BM: bone marrow, PBSC: peripheral blood stem cell, HCT-CI: hematopoietic cell transplantation-specific comorbidity index, GVHD: graft-versus-host disease, CMV: cytomegalovirus.

CMV reactivation was defined as the start of CMV preemptive therapy.

Intravenous foscarnet (FCV), ganciclovir (GCV), or oral Valganciclovir were administered as CMV preemptive therapy. Pretransplantat infection was described when patients had treatment for active bacterial/fungal/viral infection at the time of allo-SCT. Severe Infection was defined as any clinical records of blood stream infections and/or requiring intensive care unit after allo-SCT.

Supplemental Table 3. Immune reconstitution after allogeneic HSCT represented as absolute cell numbers (cells/ $\mu$ L) and IgG (mg/dL) levels measured at various time points and classified according to graft sources. Median values of temporal measurements are listed according to graft sources.

| Cells <sup>#</sup> | Day28            |                         |                  |                  | Day100            |                         |                   |                   | Day180            |                         |                    |                   | Day365             |                         |                    |                    | Day730             |                         |                    |                    |
|--------------------|------------------|-------------------------|------------------|------------------|-------------------|-------------------------|-------------------|-------------------|-------------------|-------------------------|--------------------|-------------------|--------------------|-------------------------|--------------------|--------------------|--------------------|-------------------------|--------------------|--------------------|
|                    | Overall          | CB                      | BM               | PBSC             | Overall           | CB                      | BM                | PBSC              | Overall           | CB                      | BM                 | PBSC              | Overall            | CB                      | BM                 | PBSC               | Overall            | CB                      | BM                 | PBSC               |
|                    |                  | Median (range), p value |                  |                  |                   | Median (range), p value |                   |                   |                   | Median (range), p value |                    |                   |                    | Median (range), p value |                    |                    |                    | Median (range), p value |                    |                    |
| ALC                | 480<br>(27-3290) | 420<br>(36-1888)        | 448<br>(27-2756) | 755<br>(70-3290) | 1226<br>(20-3996) | 1672<br>(84-1996)       | 1200<br>(20-2788) | 977<br>(144-3996) | 1318<br>(84-5966) | 2153<br>(84-1996)       | 1271<br>(152-5966) | 1225<br>(78-4524) | 2015<br>(27-6864)  | 2524<br>(135-6864)      | 1416<br>(27-5150)  | 1656<br>(240-4902) | 2069<br>(405-6384) | 2555<br>(988-6384)      | 1880<br>(405-5628) | 1725<br>(620-5642) |
|                    |                  | P<0.001                 |                  |                  |                   | P<0.001                 |                   |                   |                   | P<0.001                 |                    |                   |                    | P<0.001                 |                    |                    |                    |                         |                    |                    |
| IgG                | 845<br>(85-2180) | 843<br>(189-1600)       | 848<br>(88-2180) | 832<br>(85-2010) | 806<br>(25-2226)  | 853<br>(75-2200)        | 780<br>(115-1940) | 741<br>(25-2226)  | 945<br>(105-2382) | 1080<br>(205-2382)      | 860<br>(232-2079)  | 864<br>(105-1937) | 1089<br>(325-4010) | 1185<br>(441-4010)      | 1055<br>(512-3110) | 977<br>(325-2875)  | 1070<br>(625-4402) | 1067<br>(829-4018)      | 1075<br>(732-4402) | 1051<br>(625-3511) |
|                    |                  | P=0.683                 |                  |                  |                   | P=0.465                 |                   |                   |                   | P<0.001                 |                    |                   |                    | P=0.028                 |                    |                    |                    |                         |                    |                    |
| CD20+ B cell       | 33<br>(2-410)    | 25<br>(2-142)           | 32<br>(6-245)    | 35<br>(10-410)   | 110<br>(7-1970)   | 395<br>(125-1970)       | 50<br>(13-500)    | 86<br>(7-779)     | 272<br>(5-1640)   | 318<br>(16-1640)        | 142<br>(5-1055)    | 99<br>(11-580)    | 520<br>(2-3929)    | 873<br>(8-3929)         | 520<br>(2-1283)    | 143<br>(6-857)     | 531<br>(8-2852)    | 876<br>(307-2852)       | 280<br>(8-1027)    | 315<br>(29-991)    |
|                    |                  | P=0.410                 |                  |                  |                   | P<0.001                 |                   |                   |                   | P<0.001                 |                    |                   |                    | P=0.021                 |                    |                    |                    |                         |                    |                    |
| CD4+ T cell        | 95<br>(6-590)    | 86<br>(10-455)          | 111<br>(6-389)   | 185<br>(8-590)   | 262<br>(3-952)    | 275<br>(16-952)         | 239<br>(4-946)    | 270<br>(3-655)    | 356<br>(22-1624)  | 413<br>(28-1624)        | 257<br>(22-1079)   | 335<br>(25-1466)  | 396<br>(14-1495)   | 513<br>(14-1496)        | 376<br>(69-950)    | 425<br>(31-784)    | 472<br>(54-1577)   | 498<br>(155-1577)       | 491<br>(54-1310)   | 398<br>(193-849)   |
|                    |                  | P=0.018                 |                  |                  |                   | P=0.002                 |                   |                   |                   | P<0.001                 |                    |                   |                    | P<0.001                 |                    |                    |                    |                         |                    |                    |
| CD4+CD8+ T cell    | 4<br>(0-188)     | 2<br>(0-12)             | 4<br>(0-14)      | 8<br>(2-188)     | 6<br>(1-206)      | 6<br>(2-12)             | 5<br>(1-16)       | 6<br>(1-206)      | 9<br>(1-36)       | 12<br>(3-36)            | 8<br>(3-22)        | 8<br>(1-31)       | 15<br>(1-39)       | 22<br>(1-39)            | 13<br>(2-25)       | 10<br>(1-29)       | 17<br>(2-30)       | 16<br>(2-29)            | 19<br>(4-30)       | 17<br>(7-26)       |
|                    |                  | P=0.020                 |                  |                  |                   | P=0.628                 |                   |                   |                   | P=0.162                 |                    |                   |                    | P=0.012                 |                    |                    |                    |                         |                    |                    |
| CD4+CD25+ T cell   | 38<br>(2-319)    | 18<br>(2-98)            | 44<br>(6-120)    | 50<br>(6-319)    | 67<br>(2-579)     | 78<br>(6-579)           | 53<br>(2-330)     | 96<br>(2-390)     | 91<br>(8-381)     | 114<br>(10-381)         | 68<br>(8-318)      | 218<br>(12-321)   | 134<br>(1-431)     | 141<br>(1-431)          | 159<br>(7-313)     | 118<br>(11-397)    | 165<br>(13-497)    | 183<br>(31-329)         | 167<br>(13-281)    | 108<br>(74-497)    |
|                    |                  | P<0.001                 |                  |                  |                   | P<0.001                 |                   |                   |                   | P=0.146                 |                    |                   |                    | 0.005                   |                    |                    |                    |                         |                    |                    |
| CD4+CD29+ T cell   | 92<br>(3-928)    | 44<br>(6-319)           | 118<br>(12-469)  | 162<br>(8-927)   | 224<br>(3-1314)   | 247<br>(10-1314)        | 187<br>(3-935)    | 227<br>(5-640)    | 310<br>(10-1484)  | 397<br>(10-1314)        | 245<br>(39-1108)   | 245<br>(24-1484)  | 375<br>(17-1426)   | 489<br>(17-1411)        | 364<br>(47-924)    | 360<br>(31-1426)   | 488<br>(10-1562)   | 491<br>(129-1562)       | 504<br>(10-1337)   | 473<br>(162-812)   |
|                    |                  | P=0.008                 |                  |                  |                   | P=0.005                 |                   |                   |                   | P<0.001                 |                    |                   |                    | P=0.002                 |                    |                    |                    |                         |                    |                    |
| CD4+CD45RO+ T cell | 89<br>(1-426)    | 28<br>(1-268)           | 101<br>(1-426)   | 124<br>(2-418)   | 194<br>(2-881)    | 216<br>(10-881)         | 171<br>(2-841)    | 190<br>(5-489)    | 260<br>(0-160)    | 333<br>(0-1602)         | 201<br>(37-898)    | 209<br>(21-959)   | 341<br>(5-1263)    | 386<br>(5-1263)         | 330<br>(75-809)    | 291<br>(33-728)    | 335<br>(21-3606)   | 368<br>(119-1439)       | 325<br>(21-3606)   | 340<br>(128-591)   |
|                    |                  | P=0.016                 |                  |                  |                   | P=0.002                 |                   |                   |                   | P<0.001                 |                    |                   |                    | P=0.002                 |                    |                    |                    |                         |                    |                    |
| CD4+CD45RO- T cell | 32<br>(0-342)    | 28<br>(0-112)           | 36<br>(0-288)    | 33<br>(3-185)    | 31<br>(0-515)     | 42<br>(0-515)           | 23<br>(0-171)     | 38<br>(0-193)     | 37<br>(0-538)     | 62<br>(0-416)           | 29<br>(3-137)      | 42<br>(3-538)     | 55<br>(3-539)      | 70<br>(3-539)           | 45<br>(4-284)      | 56<br>(3-166)      | 74<br>(3-435)      | 71<br>(14-435)          | 52<br>(3-228)      | 101<br>(35-307)    |
|                    |                  | P=0.680                 |                  |                  |                   | P<0.001                 |                   |                   |                   | P<0.001                 |                    |                   |                    | P=0.003                 |                    |                    |                    |                         |                    |                    |
| CD4+CD45RA+ T cell | 49<br>(1-115)    | 12<br>(1-42)            | 48<br>(4-98)     | 52<br>(8-115)    | 114<br>(2-911)    | 154<br>(3-911)          | 85<br>(2-815)     | 139<br>(3-581)    | 153<br>(0-1366)   | 255<br>(0-997)          | 102<br>(12-916)    | 138<br>(16-1366)  | 205<br>(12-1507)   | 336<br>(12-1507)        | 163<br>(15-678)    | 219<br>(14-535)    | 269<br>(43-1144)   | 308<br>(45-1144)        | 212<br>(43-737)    | 252<br>(121-559)   |
|                    |                  | P<0.001                 |                  |                  |                   | P<0.001                 |                   |                   |                   | P<0.001                 |                    |                   |                    | P<0.001                 |                    |                    |                    |                         |                    |                    |
| CD4+CD45RA- T cell | 38<br>(0-99)     | 18<br>(0-33)            | 42<br>(2-88)     | 38<br>(1-128)    | 94<br>(2-610)     | 104<br>(3-610)          | 80<br>(2-325)     | 59<br>(3-281)     | 183<br>(0-1450)   | 210<br>(6-1450)         | 155<br>(12-696)    | 164<br>(16-945)   | 200<br>(12-1204)   | 360<br>(15-1204)        | 359<br>(15-987)    | 318<br>(14-1035)   | 220<br>(45-1205)   | 235<br>(65-1205)        | 250<br>(43-899)    | 252<br>(61-559)    |
|                    |                  | P=0.195                 |                  |                  |                   | P<0.001                 |                   |                   |                   | P<0.001                 |                    |                   |                    | P=0.053                 |                    |                    |                    |                         |                    |                    |
| CD8+ T cell        | 155<br>(2-610)   | 48<br>(2-98)            | 205<br>(6-320)   | 165<br>(6-610)   | 465<br>(1-2904)   | 285<br>(8-2624)         | 320<br>(1-2904)   | 377<br>(6-762)    | 575<br>(0-1640)   | 319<br>(0-1640)         | 652<br>(5-1055)    | 619<br>(11-850)   | 599<br>(5-1330)    | 489<br>(45-1330)        | 570<br>(16-932)    | 610<br>(5-860)     | 260<br>(18-1230)   | 716<br>(60-1230)        | 529<br>(18-1287)   | 585<br>(18-1387)   |
|                    |                  | P<0.001                 |                  |                  |                   | P=0.21                  |                   |                   |                   | P<0.001                 |                    |                   |                    | P<0.001                 |                    |                    |                    |                         |                    |                    |
| CD8+CD11b+ T cell  | 133<br>(3-366)   | 30<br>(3-55)            | 104<br>(3-210)   | 115<br>(5-348)   | 374<br>(7-3452)   | 285<br>(7-2246)         | 422<br>(13-3452)  | 374<br>(22-2368)  | 432<br>(0-4152)   | 427<br>(0-2649)         | 471<br>(23-2239)   | 432<br>(7-4152)   | 519<br>(1-3819)    | 499<br>(1-1985)         | 504<br>(122-3819)  | 629<br>(82-1542)   | 485<br>(78-2184)   | 435<br>(78-1597)        | 440<br>(92-2184)   | 574<br>(171-1323)  |
|                    |                  | P=0.002                 |                  |                  |                   | P=0.006                 |                   |                   |                   | P=0.197                 |                    |                   |                    | P=0.318                 |                    |                    |                    |                         |                    |                    |
| CD8+CD11b- T cell  | 30<br>(2-82)     | 24<br>(2-42)            | 32<br>(3-58)     | 36<br>(4-82)     | 69<br>(0-937)     | 40<br>(1-937)           | 103<br>(0-712)    | 92<br>(1-746)     | 83<br>(0-784)     | 56<br>(0-370)           | 119<br>(12-772)    | 112<br>(12-784)   | 115<br>(1-1045)    | 96<br>(1-618)           | 133<br>(40-1045)   | 147<br>(24-367)    | 154<br>(13-555)    | 317<br>(13-535)         | 166<br>(15-555)    | 140<br>(39-278)    |
|                    |                  | P=0.655                 |                  |                  |                   | P<0.001                 |                   |                   |                   | P<0.001                 |                    |                   |                    | P=0.036                 |                    |                    |                    |                         |                    |                    |
| CD3+CD56+ NKT cell | 48<br>(2-289)    | 12<br>(2-62)            | 46<br>(6-220)    | 62<br>(6-289)    | 21<br>(1-1930)    | 12<br>(1-256)           | 83<br>(1-1930)    | 46<br>(1-261)     | 21<br>(0-1832)    | 13<br>(0-208)           | 37<br>(3-1832)     | 47<br>(6-200)     | 20<br>(0-1034)     | 17<br>(0-365)           | 20<br>(3-1034)     | 46<br>(11-210)     | 52<br>(6-914)      | 19<br>(6-74)            | 56<br>(10-914)     | 82<br>(8-221)      |
|                    |                  | P<0.001                 |                  |                  |                   | P<0.001                 |                   |                   |                   | P<0.001                 |                    |                   |                    | P<0.001                 |                    |                    |                    |                         |                    |                    |
| CD3-CD56+ NK cell  | 175<br>(1-780)   | 132<br>(1-641)          | 189<br>(5-334)   | 229<br>(3-780)   | 223<br>(2-2150)   | 351<br>(17-2150)        | 170<br>(2-1945)   | 143<br>(2-1372)   | 226<br>(0-2295)   | 350<br>(0-2295)         | 165<br>(16-1632)   | 131<br>(10-1395)  | 298<br>(15-1352)   | 324<br>(32-1167)        | 181<br>(34-947)    | 166<br>(15-1352)   | 305<br>(50-1512)   | 324<br>(97-675)         | 184<br>(50-1512)   | 250<br>(51-368)    |
|                    |                  | P<0.001                 |                  |                  |                   | P<0.001                 |                   |                   |                   | P<0.001                 |                    |                   |                    | P<0.001                 |                    |                    |                    |                         |                    |                    |
| CD16+CD57+ NK cell | 88<br>(2-491)    | 62<br>(2-328)           | 74<br>(4-310)    | 80<br>(6-398)    | 156<br>(1-2934)   | 161<br>(6-2934)         | 152<br>(1-2227)   | 161<br>(5-1394)   | 228<br>(0-2216)   | 296<br>(0-2407)         | 199<br>(18-2216)   | 165<br>(12-1498)  | 342<br>(1-2563)    | 404<br>(1-2235)         | 344<br>(40-2563)   | 252<br>(30-1291)   | 355<br>(2-1981)    | 403<br>(45-1981)        | 366<br>(2-1914)    | 279<br>(79-694)    |
|                    |                  | P=0.059                 |                  |                  |                   | P=0.605                 |                   |                   |                   | P=0.016                 |                    |                   |                    | P=0.048                 |                    |                    |                    |                         |                    |                    |
| CD16+CD57- NK cell | 44<br>(1-242)    | 22<br>(1-132)           | 26<br>(1-188)    | 25<br>(2-242)    | 245<br>(3-1825)   | 439<br>(276-1825)       | 172<br>(3-1359)   | 158<br>(12-675)   | 260<br>(0-3356)   | 460<br>(0-3356)         | 163<br>(34-817)    | 176<br>(16-252)   | 226<br>(6-1672)    | 407<br>(6-1672)         | 188<br>(41-765)    | 190<br>(28-532)    | 245<br>(4-1227)    | 317<br>(88-1227)        | 191<br>(4-549)     | 238<br>(103-597)   |
|                    |                  | P=0.186                 |                  |                  |                   | P<0.001                 |                   |                   |                   | P<0.001                 |                    |                   |                    | P<0.001                 |                    |                    |                    |                         |                    |                    |

Absolute cell counts (cells/ $\mu$ L)

Supplemental Table 4. Comparison of median and cut-off values, using Kruskal–Wallis one-way analysis and ROC according to graft sources, respectively.

| Cells #            | Day100 median values of cell counts |                         |                   | Day100 cut-off values by ROC methods (OS) |                               |                               |                               |                                 |
|--------------------|-------------------------------------|-------------------------|-------------------|-------------------------------------------|-------------------------------|-------------------------------|-------------------------------|---------------------------------|
|                    | Overall                             | CB                      | BM                | PBSC                                      | Overall                       | CB                            | BM                            | PBSC                            |
|                    |                                     | Median (range), p value |                   |                                           |                               | cut-off [AUC] (95% CI)        |                               |                                 |
| ALC                | 1226<br>(20-3996)                   | 1672<br>(84-1996)       | 1200<br>(20-2788) | 977<br>(144-3996)                         | 820<br>[0.682]<br>(0.61-0.75) | 1180<br>[0.62]<br>(0.49-0.75) | 544<br>0.695<br>(0.59-0.80)   | 1440<br>[0.6646]<br>(0.51-0.81) |
|                    |                                     | P<0.001                 |                   |                                           |                               |                               |                               |                                 |
| IgG                | 806<br>(25-2226)                    | 853<br>(75-2200)        | 780<br>(115-1940) | 741<br>(25-2226)                          | 617<br>[0.607]<br>(0.53-0.68) | 450<br>[0.619]<br>(0.49-0.75) | 575<br>[0.58]<br>(0.48-0.69)  | 387<br>[0.622]<br>(0.45-0.80)   |
|                    |                                     | P=0.465                 |                   |                                           |                               |                               |                               |                                 |
| CD20+ B cell       | 110<br>(7-1970)                     | 395<br>(125-1970)       | 50<br>(13-500)    | 86<br>(7-779)                             | 140<br>[0.718]<br>(0.66-0.78) | 180<br>[0.68]<br>(0.55-0.82)  | 120<br>[0.697]<br>(0.60-0.79) | 59<br>[0.562]<br>(0.41-0.72)    |
|                    |                                     | P<0.001                 |                   |                                           |                               |                               |                               |                                 |
| CD4+ T cell        | 262<br>(3-952)                      | 275<br>(16-952)         | 239<br>(4-946)    | 270<br>(3-655)                            | 111<br>[0.642]<br>(0.57-0.71) | 149<br>[0.56]<br>(0.42-0.70)  | 106<br>[0.676]<br>(0.58-0.78) | 92<br>[0.607]<br>(0.45-0.77)    |
|                    |                                     | P=0.002                 |                   |                                           |                               |                               |                               |                                 |
| CD4+CD8+ T cell    | 6<br>(1-206)                        | 6<br>(2-12)             | 5<br>(1-16)       | 6<br>(1-206)                              | 3<br>[0.61]<br>(0.54-0.68)    | 2.0<br>[0.59]<br>(0.45-0.73)  | 3.0<br>[0.657]<br>(0.55-0.76) | 8<br>[0.457]<br>(0.29-0.62)     |
|                    |                                     | P=0.628                 |                   |                                           |                               |                               |                               |                                 |
| CD4+CD25+ T cell   | 67<br>(2-579)                       | 78<br>(6-579)           | 53<br>(2-330)     | 96<br>(2-390)                             | 33<br>[0.637]<br>(0.57-0.71)  | 80<br>[0.521]<br>(0.39-0.65)  | 50<br>[0.702]<br>(0.61-0.80)  | 42<br>[0.597]<br>(0.43-0.77)    |
|                    |                                     | P<0.001                 |                   |                                           |                               |                               |                               |                                 |
| CD4+CD29+ T cell   | 224<br>(3-1314)                     | 247<br>(10-1314)        | 187<br>(3-935)    | 227<br>(5-640)                            | 117<br>[0.651]<br>(0.58-0.72) | 112<br>[0.579]<br>(0.43-0.73) | 143<br>[0.684]<br>(0.58-0.79) | 81<br>[0.618]<br>(0.46-0.78)    |
|                    |                                     | P=0.005                 |                   |                                           |                               |                               |                               |                                 |
| CD4+CD45RO+ T cell | 194<br>(2-881)                      | 216<br>(10-881)         | 171<br>(2-841)    | 190<br>(5-489)                            | 128<br>[0.643]<br>(0.57-0.72) | 122<br>[0.57]<br>(0.42-0.72)  | 128<br>[0.675]<br>(0.57-0.78) | 59<br>[0.619]<br>(0.46-0.78)    |
|                    |                                     | P=0.002                 |                   |                                           |                               |                               |                               |                                 |
| CD4+CD45RO- T cell | 31<br>(0-515)                       | 42<br>(0-515)           | 23<br>(0-171)     | 38<br>(0-193)                             | 28<br>[0.64]<br>(0.57-0.71)   | 15<br>[0.643]<br>(0.52-0.76)  | 23<br>[0.621]<br>(0.52-0.73)  | 10<br>[0.544]<br>(0.38-0.71)    |
|                    |                                     | P<0.001                 |                   |                                           |                               |                               |                               |                                 |
| CD4+CD45RA+ T cell | 114<br>(2-911)                      | 154<br>(3-911)          | 85<br>(2-815)     | 139<br>(3-581)                            | 86<br>[0.693]<br>(0.63-0.76)  | 86<br>[0.634]<br>(0.50-0.77)  | 86<br>[0.744]<br>(0.65-0.84)  | 41<br>[0.571]<br>(0.41-0.74)    |
|                    |                                     | P<0.001                 |                   |                                           |                               |                               |                               |                                 |
| CD4+CD45RA- T cell | 94<br>(2-610)                       | 104<br>(3-610)          | 80<br>(2-325)     | 59<br>(3-281)                             | 65<br>[0.583]<br>(0.51-0.66)  | 119<br>[0.489]<br>(0.35-0.63) | 52<br>[0.618]<br>(0.51-0.73)  | 17<br>[0.622]<br>(0.47-0.78)    |
|                    |                                     | P<0.001                 |                   |                                           |                               |                               |                               |                                 |
| CD8+ T cell        | 465<br>(1-2904)                     | 285<br>(8-2624)         | 320<br>(1-2904)   | 377<br>(6-762)                            | 326<br>[0.595]<br>(0.52-0.67) | 410<br>[0.542]<br>(0.42-0.67) | 294<br>[0.647]<br>(0.54-0.75) | 326<br>[0.591]<br>(0.43-0.75)   |
|                    |                                     | P=0.21                  |                   |                                           |                               |                               |                               |                                 |
| CD8+CD11b+ T cell  | 374<br>(7-3452)                     | 285<br>(7-2246)         | 422<br>(13-3452)  | 374<br>(22-2368)                          | 256<br>[0.645]<br>(0.57-0.72) | 256<br>[0.61]<br>(0.48-0.74)  | 254<br>[0.699]<br>(0.60-0.80) | 266<br>[0.644]<br>(0.49-0.80)   |
|                    |                                     | P=0.006                 |                   |                                           |                               |                               |                               |                                 |
| CD8+CD11b- T cell  | 69<br>(0-937)                       | 40<br>(1-937)           | 103<br>(0-712)    | 92<br>(1-746)                             | 43<br>[0.587]<br>(0.51-0.66)  | 41<br>[0.615]<br>(0.49-0.74)  | 48<br>[0.676]<br>(0.57-0.78)  | 112<br>[0.432]<br>(0.26-0.60)   |
|                    |                                     | P<0.001                 |                   |                                           |                               |                               |                               |                                 |
| CD3+CD56+ NKT cell | 21<br>(1-1930)                      | 12<br>(1-256)           | 83<br>(1-1930)    | 46<br>(1-261)                             | 31<br>[0.486]<br>(0.41-0.56)  | 10<br>[0.508]<br>(0.37-0.65)  | 16<br>[0.658]<br>(0.56-0.76)  | 23<br>[0.534]<br>(0.37-0.70)    |
|                    |                                     | P<0.001                 |                   |                                           |                               |                               |                               |                                 |
| CD3-CD56+ NK cell  | 223<br>(2-2150)                     | 351<br>(17-2150)        | 170<br>(2-1945)   | 143<br>(2-1372)                           | 159<br>[0.693]<br>(0.63-0.76) | 248<br>[0.601]<br>(0.47-0.74) | 135<br>[0.72]<br>(0.62-0.82)  | 159<br>[0.604]<br>(0.44-0.77)   |
|                    |                                     | P<0.001                 |                   |                                           |                               |                               |                               |                                 |
| CD16+CD57+ NK cell | 156<br>(1-2934)                     | 161<br>(6-2934)         | 152<br>(1-2227)   | 161<br>(5-1394)                           | 103<br>[0.676]<br>(0.61-0.74) | 103<br>[0.628]<br>(0.50-0.76) | 159<br>[0.739]<br>(0.64-0.83) | 174<br>[0.655]<br>(0.51-0.81)   |
|                    |                                     | P=0.605                 |                   |                                           |                               |                               |                               |                                 |
| CD16+CD57- NK cell | 245<br>(3-1825)                     | 439<br>(276-1825)       | 172<br>(3-1359)   | 158<br>(12-675)                           | 191<br>[0.729]<br>(0.67-0.79) | 205<br>[0.624]<br>(0.49-0.75) | 181<br>[0.76]<br>(0.67-0.85)  | 168<br>[0.637]<br>(0.48-0.80)   |
|                    |                                     | P<0.001                 |                   |                                           |                               |                               |                               |                                 |

ALC, absolute cell counts (cells/ $\mu$ L); IgG, immunoglobulin G (mg/dL); AUC, area under the curve; 95% CI, 95% confidence interval.  
 CB, cord blood; BM, bone marrow; PBSC, peripheral blood stem cell.

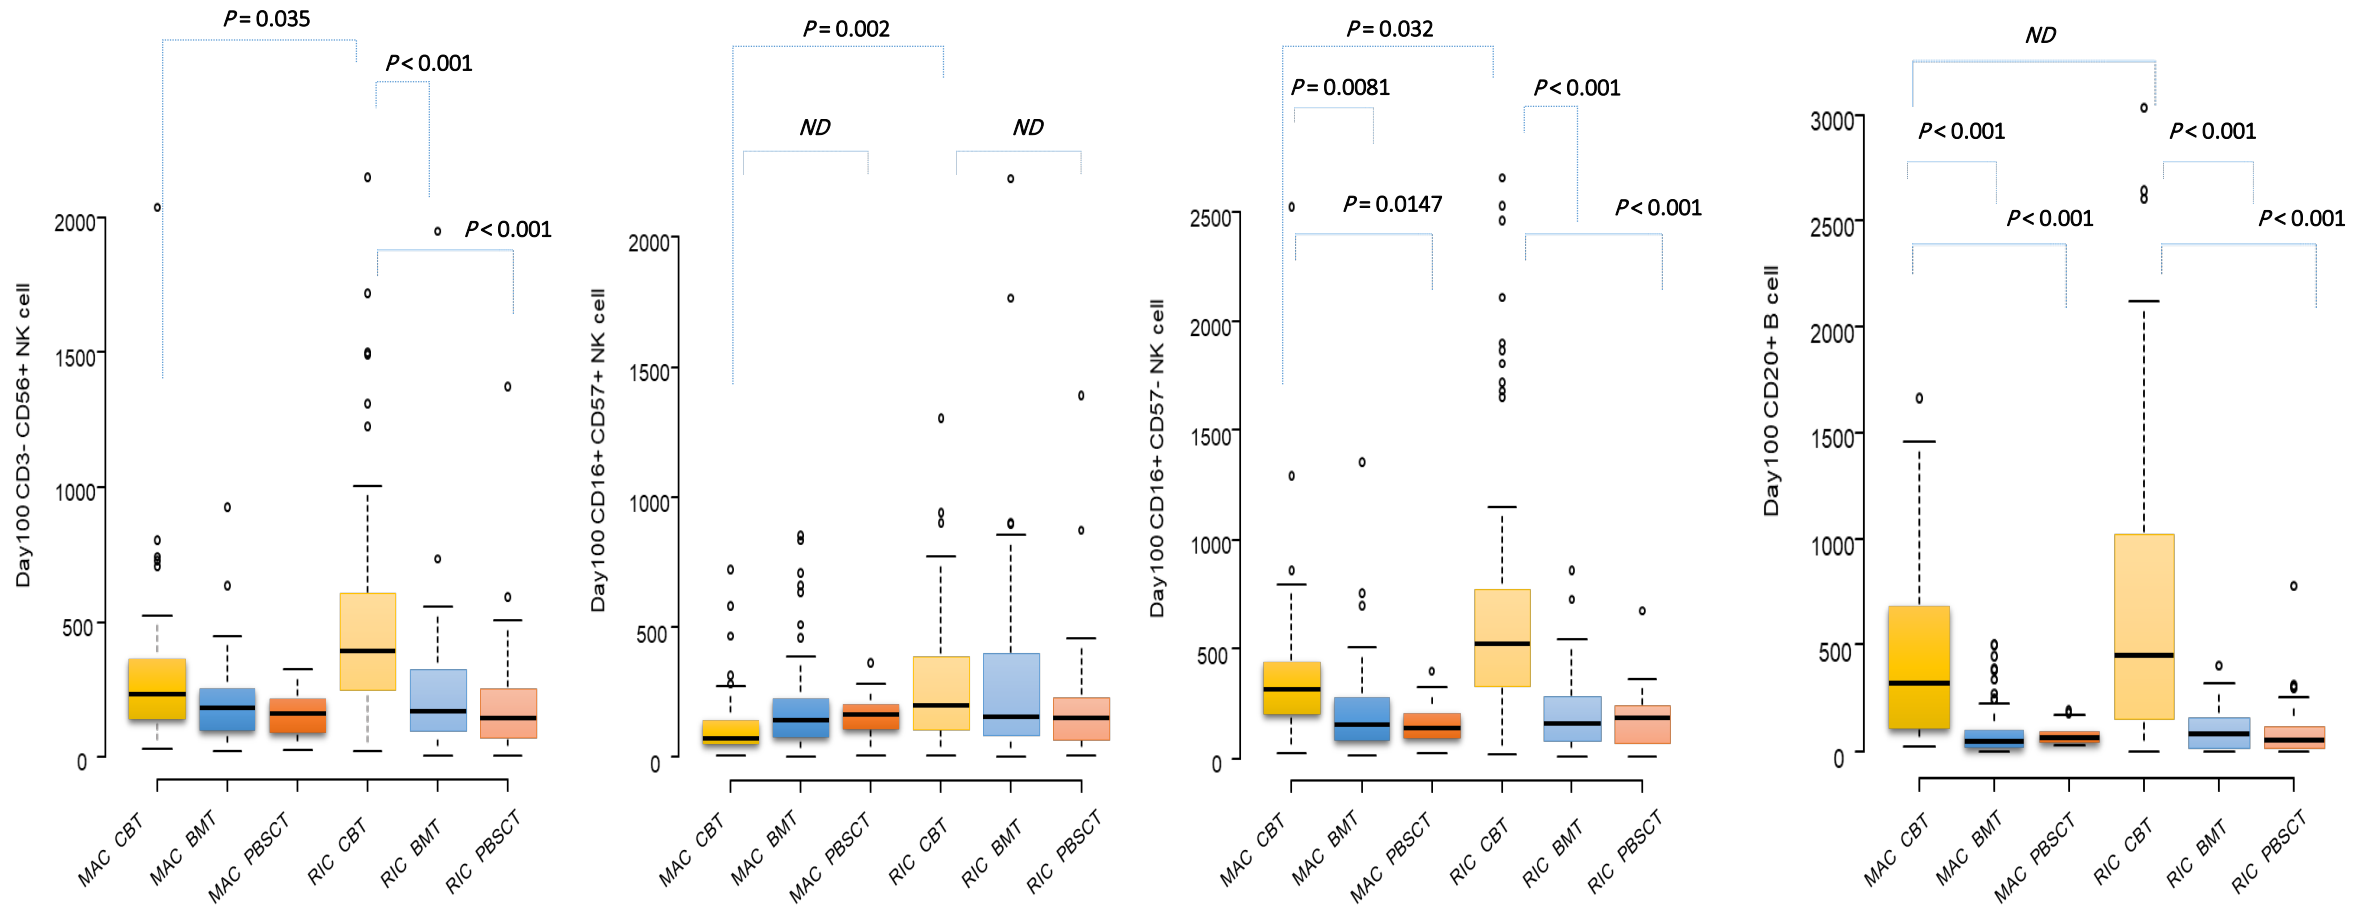

Supplemental Figure 1. NK cells and B cell recovery as a function of conditioning intensities among graft sources.

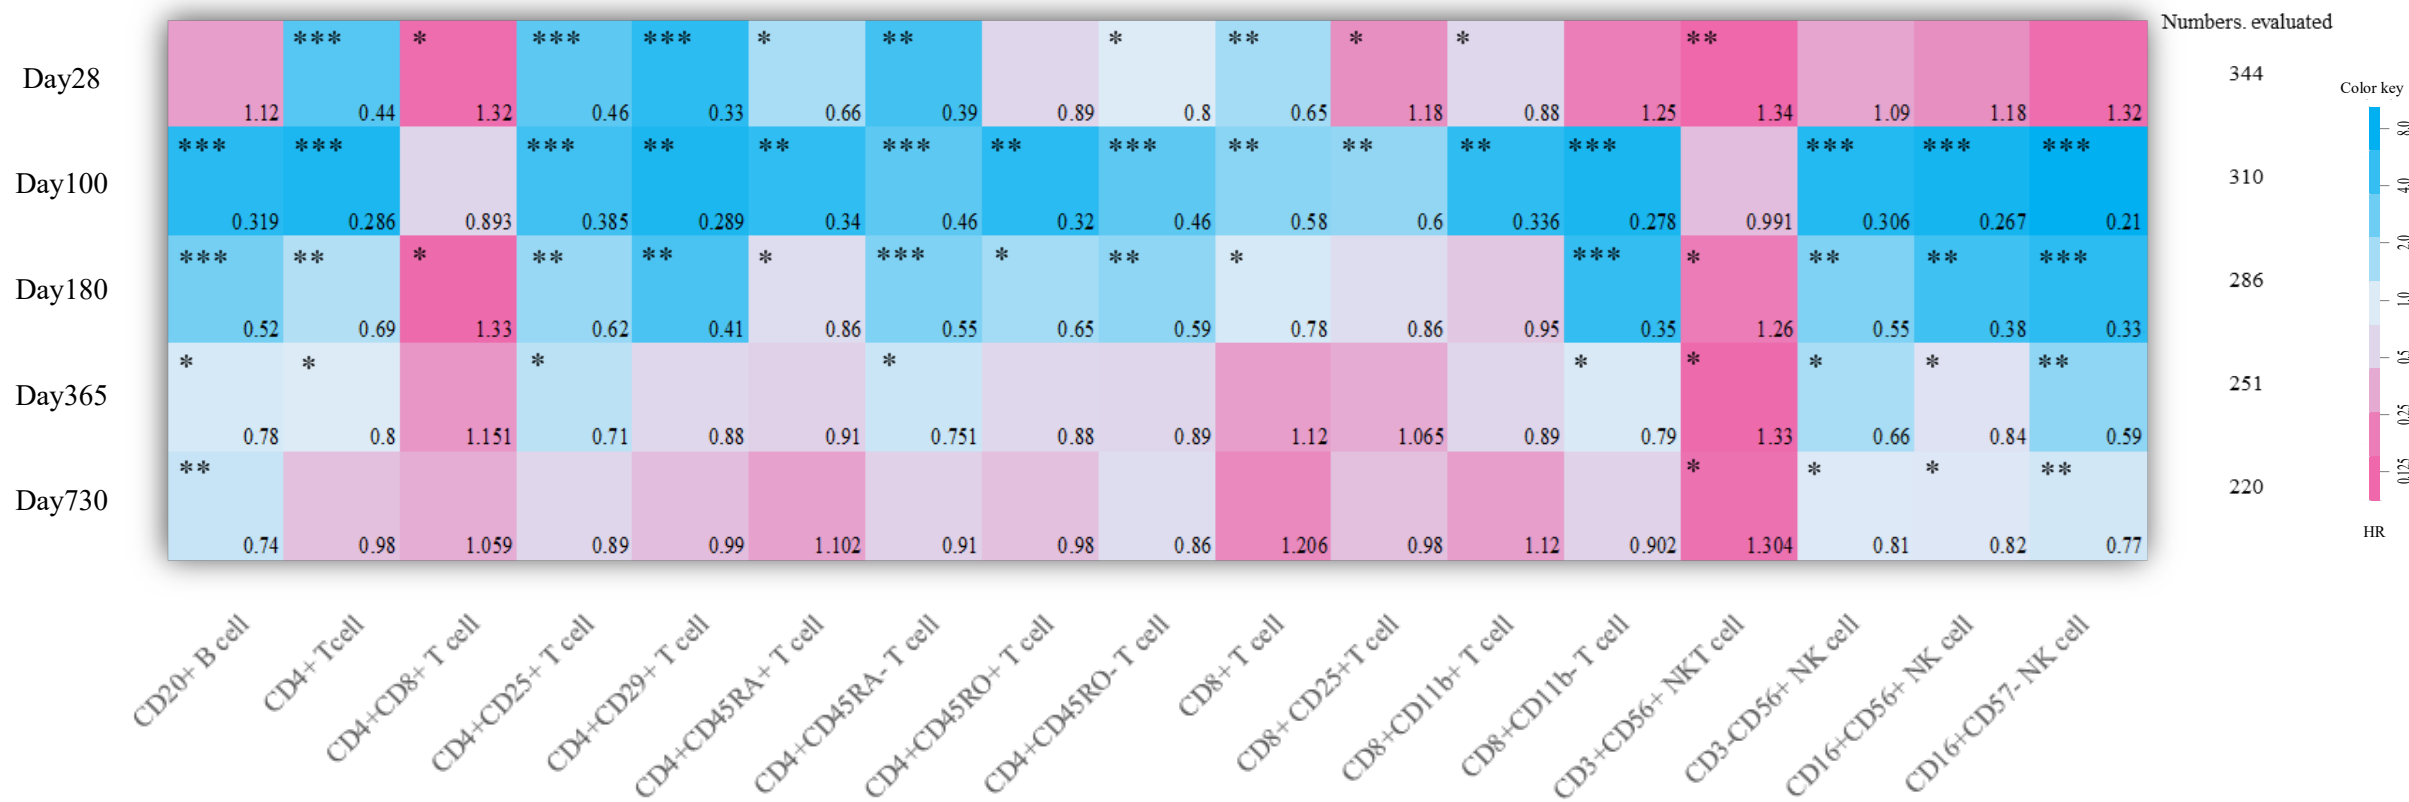

Supplemental Figure 2. A heatmap of timely reconstituting lymphocytes were shown for OS at different landmark time points. Univariate analysis showed each hazard ratio and P value in every presented cells at different time points. Median cell counts were used for landmark analyses.  $P < .05$  (\*),  $P < .01$  (\*\*),  $P < .001$  (\*\*\*)

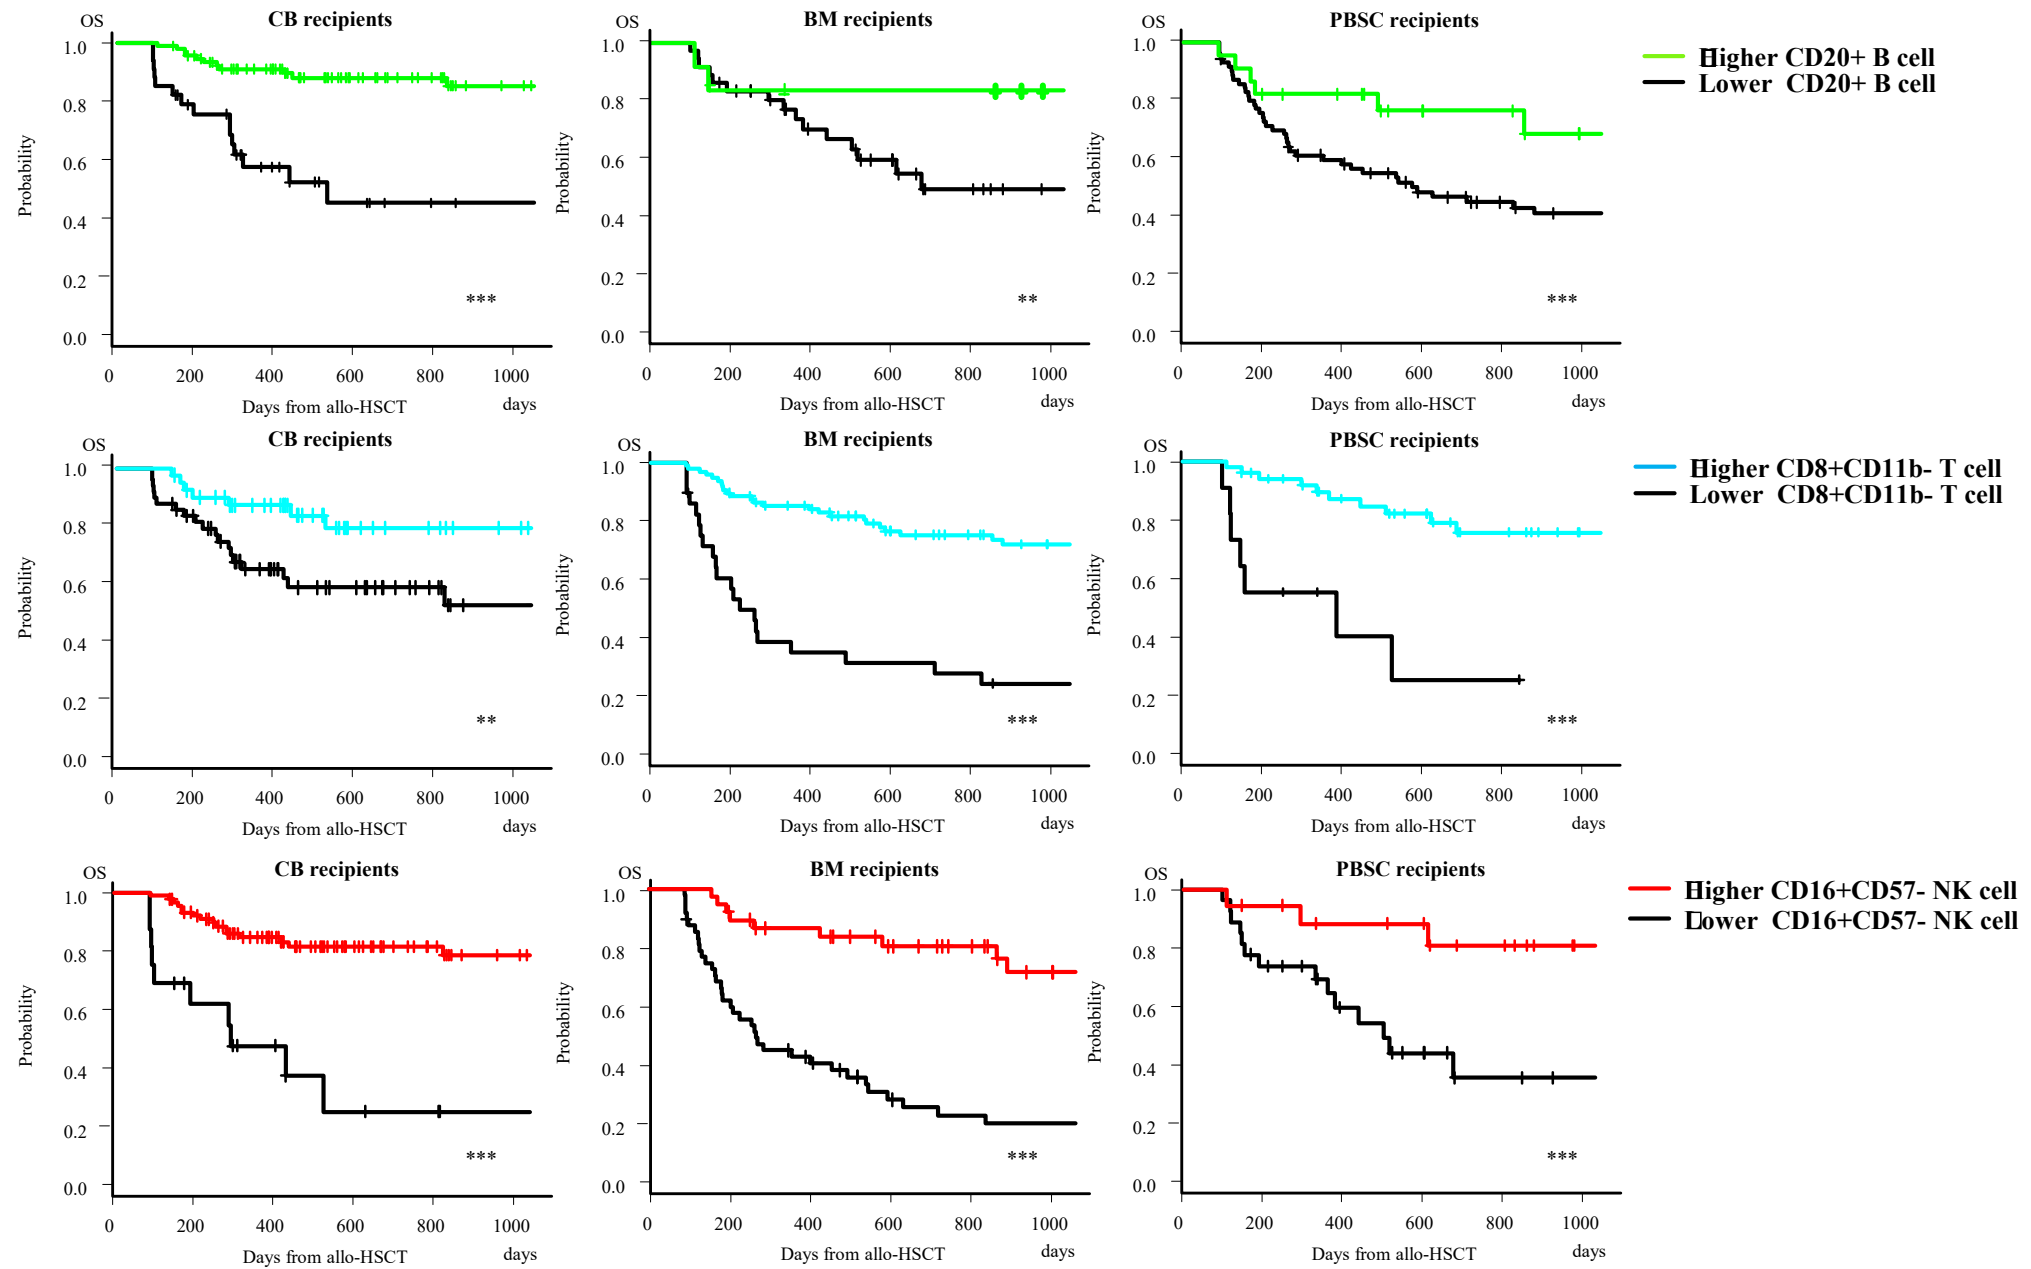

Supplemental Figure 3. Graft-validated outcomes at 2 years based on specific cell types, namely CD20+ B cells, CD8+CD11b- T cells, and CD16+CD57- NK cells.  $P < .01$  (\*\*),  $P < .001$  (\*\*\*).
